# Supplementary material for: Naturally available hypericin undergoes electron transfer for type I photodynamic and photothermal synergistic therapy
Source: Royal Society of Chemistry journal article supplement (doi:10.1039/d0bm00021c), 2020-01-01
Supplement: d0bm00021c1.pdf [file d0bm00021c1.pdf]

## Naturally available hypericin undergoing electron transfer for type I photodynamic and photothermal synergistic therapy

Zhen Ke†<sup>a</sup>, Aize Xie†<sup>b</sup>, Jianjiao Chen<sup>a</sup>, Zhenyuan Zou<sup>a</sup>, Lei Shen\*<sup>c</sup>, Yansong Dai\*<sup>d</sup>,  
Dengfeng Zou\*<sup>a</sup>

*a.* School of Pharmacy, Guilin Medical University, Guilin 541004, Guangxi, P.R. China, Email: [zdf1226@126.com](mailto:zdf1226@126.com)

*b.* The First Affiliated Hospital of Guangxi Medical University, Nanning 530021, Guangxi, P.R. China

*c.* Jiangsu Laboratory of Advanced Functional Material, Department of Chemistry and Material Engineering, Changshu Institute of Technology, Changshu 215500, Jiangsu, P.R. China Email: [leishen@cslg.edu.cn](mailto:leishen@cslg.edu.cn)

*d.* Virginia University of Integrative Medicine, Fairfax, 22031, Virginia, USA. Email: [daiyansong@gmail.com](mailto:daiyansong@gmail.com)

†: These authors contribute equally to the work

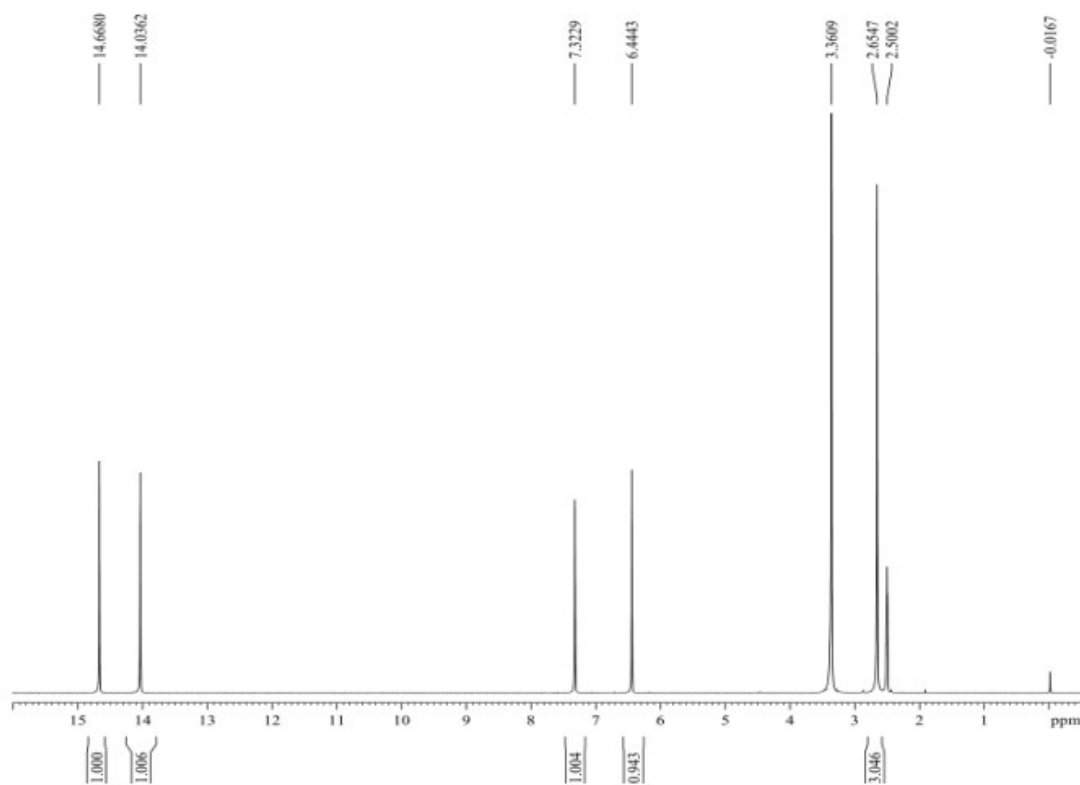

Figure S1 <sup>1</sup>H NMR spectra of **HC** in CDCl<sub>3</sub>

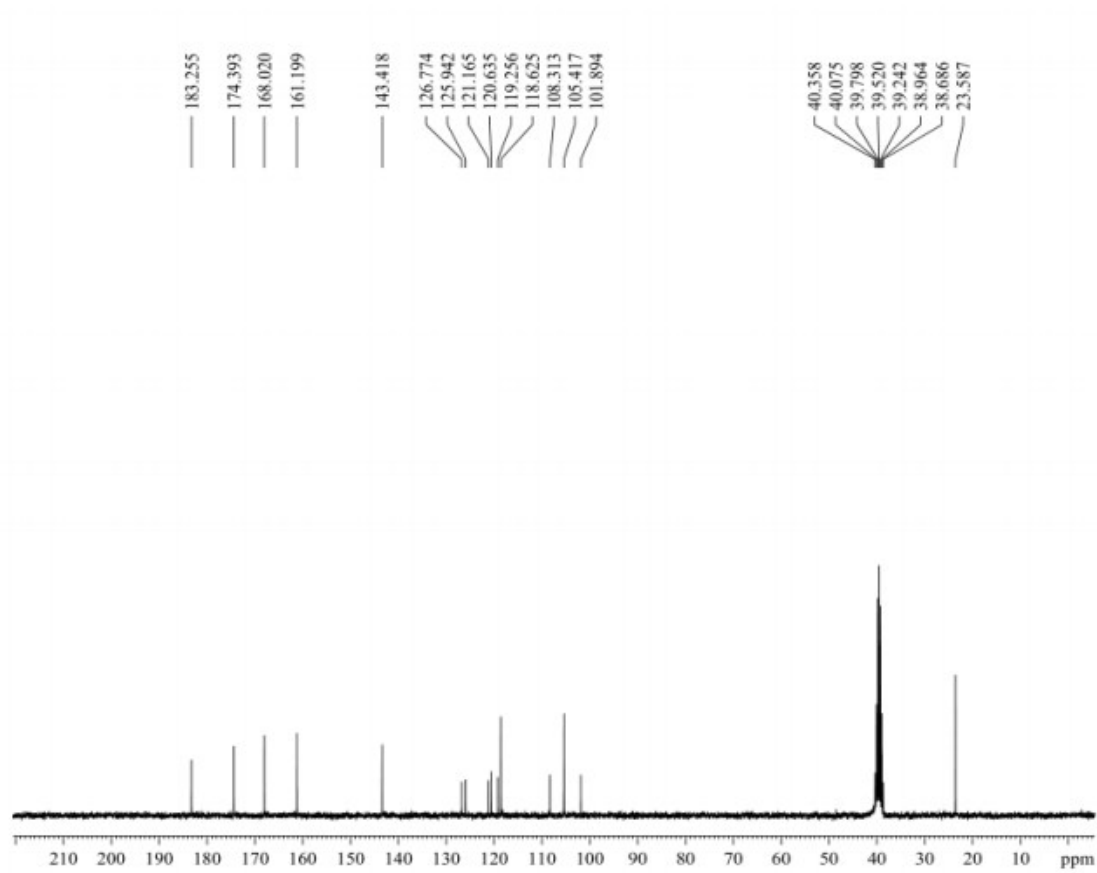

Figure S2 (a)  $^{13}\text{C}$ NMR of **HC** in  $\text{CDCl}_3$

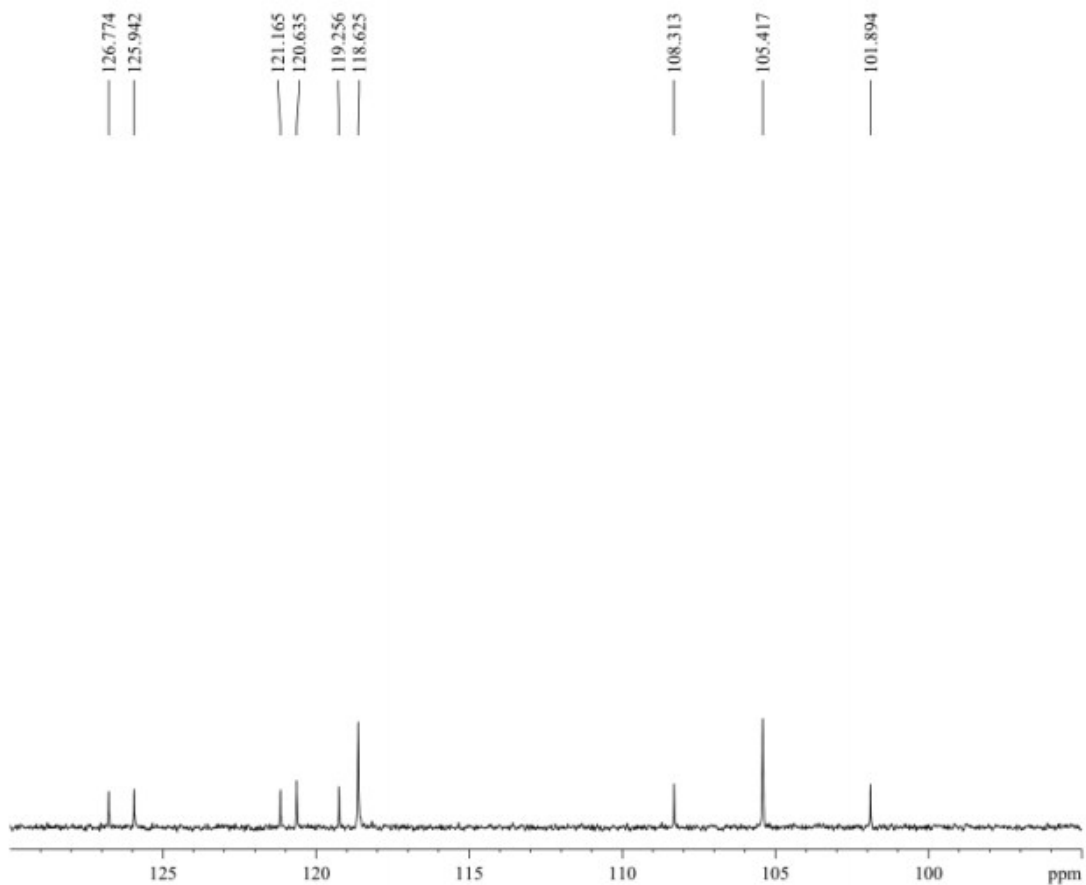

(b)  $^{13}\text{C}$ NMR of **HC** in  $\text{CDCl}_3$  from 130 to 90 ppm

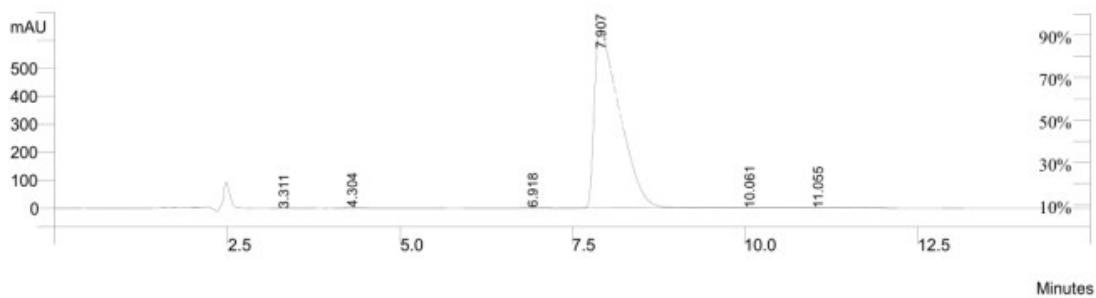

| Peak No       | Peak Name | Area (counts)    | Result ()       | Ret. Time (min) | Width 1/2 (sec) |
|---------------|-----------|------------------|-----------------|-----------------|-----------------|
| 1             |           | 115754           | 0.0705          | 3.311           | 8.6             |
| 2             |           | 468341           | 0.2852          | 4.304           | 9.7             |
| 3             |           | 501820           | 0.3056          | 6.918           | 12.4            |
| 4             |           | 162519536        | 98.9725         | 7.907           | 24.0            |
| 5             |           | 209014           | 0.1273          | 10.061          | 0.0             |
| 6             |           | 392380           | 0.2390          | 11.055          | 0.0             |
| <b>Totals</b> |           | <b>164206848</b> | <b>100.0001</b> |                 |                 |

Figure S3 HPLC of **HC**

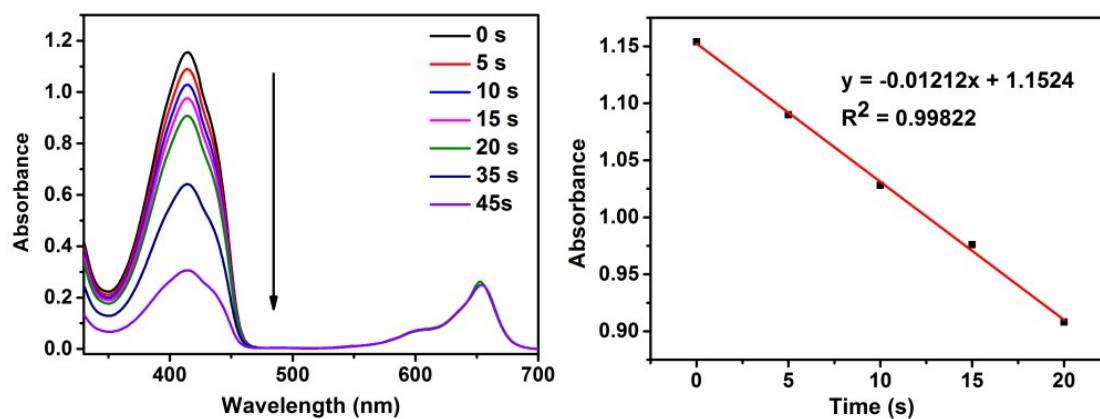

Figure S4 (a) Degradation of DPBF under the presence of **MB** with irradiation; (b) linear fitting of the absorbance.

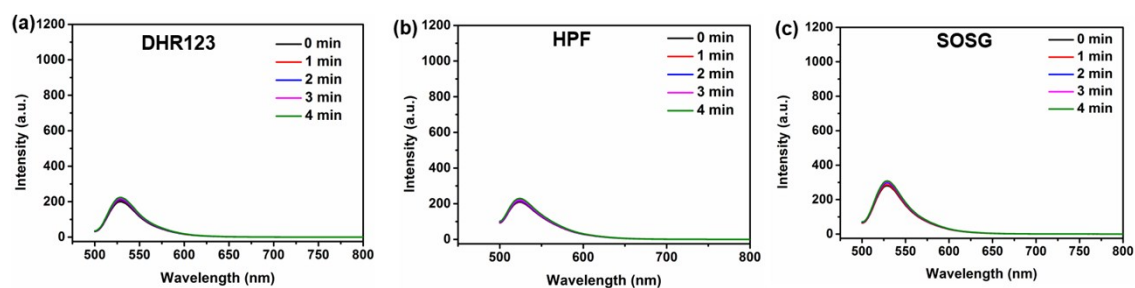

Figure S5 Fluorescence change of (a) DHR123; (b) HPF and (c) SOSG with irradiation. (660 nm, 0.1 W/cm<sup>2</sup>).

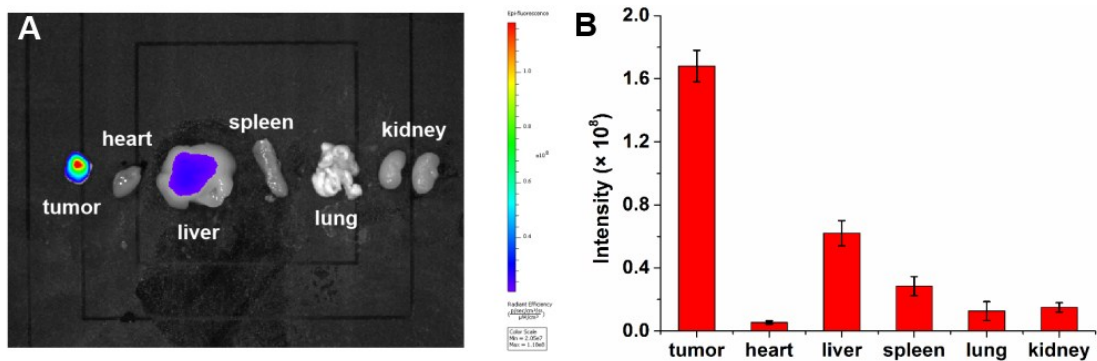

Figure S6 (A) Biodistribution of HC NPs in tumor, heart, liver, spleen, lung and kidney after 48 h post injection; (B) Fluorescence intensity of tumor, heart, liver, spleen, lung and kidney. (n = 3)

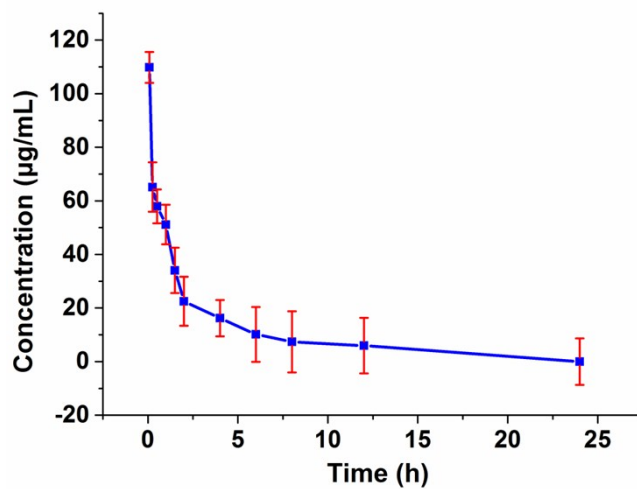

Figure S7 Time dependent drug concentration of HC NPs in mice (n = 6)
